# Supplementary material for: Convergent evolution of skin surface microarchitecture and increased skin hydrophobicity in semi-aquatic anole lizards
Source: Oxford University Press journal article supplement (doi:10.1242/jeb.242939), 2021-10-01
Supplement: jeb242939supp.pdf [file jeb242939supp.pdf]

**Table S1.** List of museum specimens used in the current study, with information on the museum of collection, identification (ID) number, and snout-to-vent length (SVL).

| Number | Species                     | Collection | ID number | SVL (mm) |
|--------|-----------------------------|------------|-----------|----------|
| 1      | <i>Anolis acutus</i>        | MCZ        | 34764     | 61.91    |
| 2      | <i>Anolis acutus</i>        | MCZ        | 34759     | 63.71    |
| 3      | <i>Anolis aquaticus</i>     | MCZ        | 186135    | 74.69    |
| 4      | <i>Anolis aquaticus</i>     | MCZ        | 186143    | 60.85    |
| 5      | <i>Anolis aquaticus</i>     | UF         | 72360     | 68.2     |
| 6      | <i>Anolis aquaticus</i>     | UF         | 72371     | 66.25    |
| 7      | <i>Anolis bartschi</i>      | MCZ        | 93471     | 71.34    |
| 8      | <i>Anolis bartschi</i>      | MCZ        | 93460     | 70.73    |
| 9      | <i>Anolis christophei</i>   | MCZ        | 186676    | 44.31    |
| 10     | <i>Anolis christophei</i>   | MCZ        | 186680    | 46.57    |
| 11     | <i>Anolis christophei</i>   | UKansas    | V33784    | 49.32    |
| 12     | <i>Anolis christophei</i>   | UKansas    | V33782    | 49.24    |
| 13     | <i>Anolis eugenegrahami</i> | MCZ        | 154497    | 72.63    |
| 14     | <i>Anolis eugenegrahami</i> | MCZ        | 154507    | 67.94    |
| 15     | <i>Anolis evermanni</i>     | MCZ        | 36034     | 69.76    |
| 16     | <i>Anolis evermanni</i>     | MCZ        | 36000     | 71.69    |
| 17     | <i>Anolis granuliceps</i>   | MCZ        | 100364    | 50.69    |
| 18     | <i>Anolis granuliceps</i>   | MCZ        | 115695    | 45.79    |
| 19     | <i>Anolis lionotus</i>      | MCZ        | 19374     | 52.87    |
| 20     | <i>Anolis lionotus</i>      | MCZ        | 100432    | 51.89    |
| 21     | <i>Anolis poecilopus</i>    | MCZ        | 177829    | 57.74    |
| 22     | <i>Anolis poecilopus</i>    | MCZ        | 177830    | 65.89    |
| 23     | <i>Anolis poecilopus</i>    | UF         | 123004    | 69.24    |
| 24     | <i>Anolis poecilopus</i>    | UF         | 123017    | 67.42    |
| 25     | <i>Anolis poecilopus</i>    | UKansas    | 3355      | 60.83    |
| 26     | <i>Anolis poecilopus</i>    | UKansas    | 3356      | 62.84    |
| 27     | <i>Anolis stratulus</i>     | MCZ        | R-179214  | 46.42    |
| 28     | <i>Anolis stratulus</i>     | MCZ        | R-179222  | 44.39    |
| 29     | <i>Anolis townsendi</i>     | MCZ        | R-139154  | 43.36    |
| 30     | <i>Anolis townsendi</i>     | MCZ        | R-139148  | 46.53    |
| 31     | <i>Anolis vermiculatus</i>  | MCZ        | 38426     | 116.01   |
| 32     | <i>Anolis vermiculatus</i>  | MCZ        | 38428     | 120.76   |
| 33     | <i>Anolis vermiculatus</i>  | AMNH       | R-78623   | 88.82    |
| 34     | <i>Anolis vermiculatus</i>  | AMNH       | R-78627   | 117.32   |
| 35     | <i>Anolis woodi</i>         | MCZ        | 186125    | 60.66    |
| 36     | <i>Anolis woodi</i>         | MCZ        | 186177    | 68.78    |
| 37     | <i>Anolis oxylophus</i>     | MCZ        | 129353    | 69.65    |
| 38     | <i>Anolis oxylophus</i>     | MCZ        | 129351    | 61.38    |
| 39     | <i>Anolis limifrons</i>     | MCZ        | 109978    | 42.19    |
| 40     | <i>Anolis limifrons</i>     | MCZ        | 109976    | 42.25    |
| 41     | <i>Anolis oculatus</i>      | MCZ        | 60350     | 76.67    |
| 42     | <i>Anolis oculatus</i>      | MCZ        | 60353     | 75.53    |
| 43     | <i>Anolis cuvieri</i>       | MCZ        | 35975     | 122.89   |
| 44     | <i>Anolis cuvieri</i>       | MCZ        | 127119    | 115.95   |
| 45     | <i>Anolis gracilipes</i>    | MCZ        | 124408    | 56.91    |
| 46     | <i>Anolis gracilipes</i>    | MCZ        | 124405    | 51.94    |
| 47     | <i>Anolis woodi</i>         | LACM       | 148154    | 71.00    |
| 48     | <i>Anolis woodi</i>         | LACM       | 148168    | 81.53    |
| 49     | <i>Anolis lionotus</i>      | LACM       | 170282    | 78.16    |
| 50     | <i>Anolis lionotus</i>      | LACM       | 170285    | 79.86    |
| 51     | <i>Anolis aquaticus</i>     | LACM       | 166305    | 66.43    |
| 52     | <i>Anolis aquaticus</i>     | LACM       | 166325    | 68.59    |
